# Supplementary material for: The role of osmolytes in the temperature-triggered conformational transition of poly(N-vinylcaprolactam): an experimental and computational study
Source: Royal Society of Chemistry journal article supplement (doi:10.1039/c9cp06683g), 2020-01-01
Supplement: c9cp06683g1.pdf [file c9cp06683g1.pdf]

## The role of osmolytes in the temperature-triggered conformational transition of poly(N-vinylcaprolactam): an experimental and computational study

Payal Narang<sup>1</sup>, Tiago E. de Oliveira<sup>2\*</sup>, Pannuru Venkatesu<sup>1\*</sup> and Paulo A. Netz<sup>2</sup>

<sup>1</sup> Department of Chemistry, University of Delhi, Delhi – 110007, India

<sup>2</sup> Universidade Federal do Rio Grande do Sul, Porto Alegre, Brazil

**Table S1:** The table presents the derived partial charges on the atoms of PVCL monomer using ATB 3.0.

| Region   | Group and atom |   | Derived charges |
|----------|----------------|---|-----------------|
| Backbone | CH1            | C | 0.229           |
|          |                | H | 0.070           |
|          | CH2            | C | -0.387          |
|          |                | H | 0.122           |
| Amide    | CAM            | C | 0.531           |
|          | NAM            | N | -0.213          |
|          | OAM            | O | -0.616          |
| Cycle    | CC1            | C | -0.170          |
|          |                | H | 0.065           |
|          | CC2            | C | 0.033           |
|          |                | H | 0.016           |
|          | CC3            | C | -0.070          |
|          |                | H | 0.026           |
|          | CC4            | C | 0.025           |
|          |                | H | 0.022           |
|          | CC5            | C | -0.124          |
|          |                | H | 0.095           |

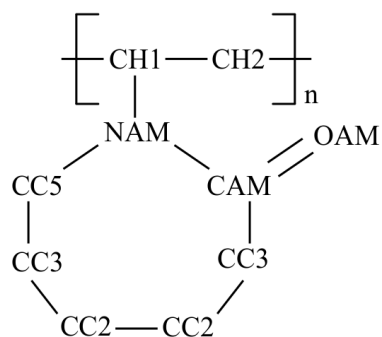

**Figure S1:** Atom types for the PVCL monomer

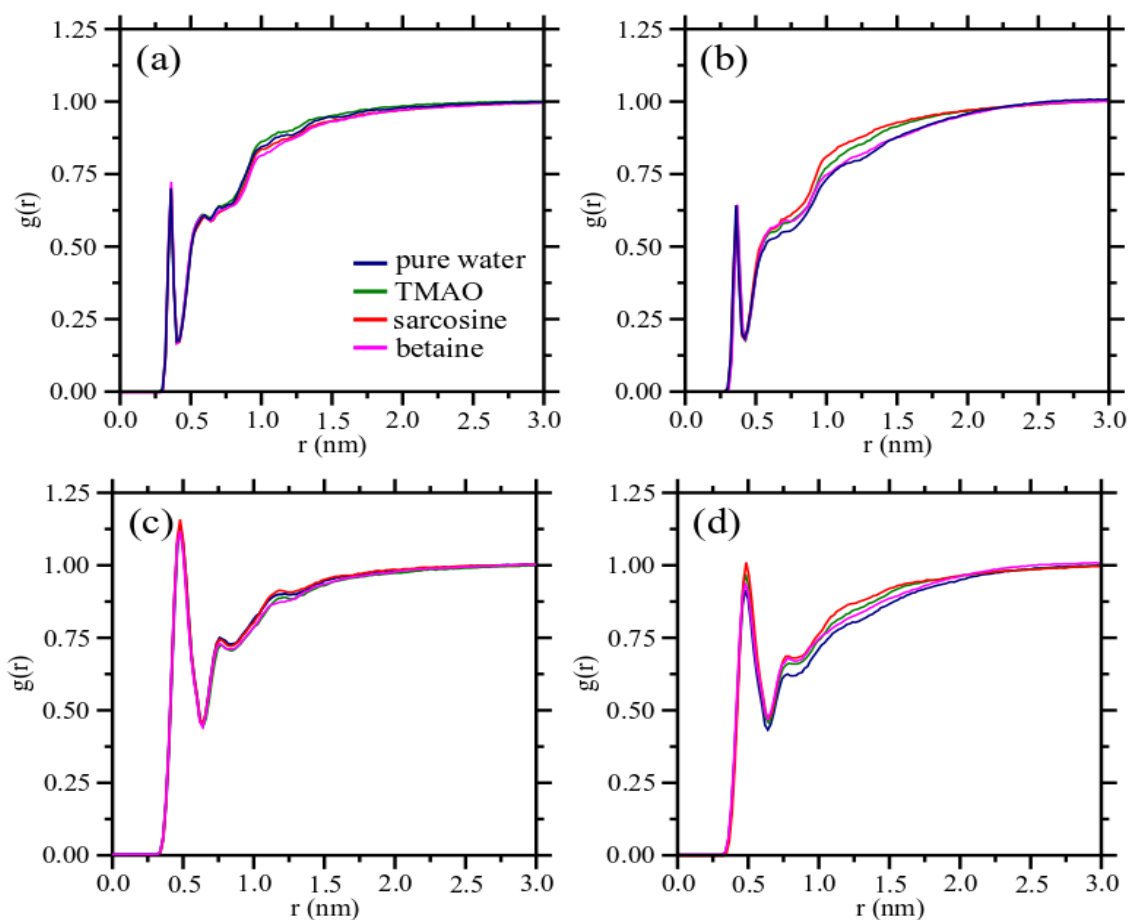

**Figure S2:** Radial distribution function (all) polymer-water at 280K (a) and 340 K (b), and between the atoms belonging to the side cycle and water at 280 K (c) and 340 K (d).

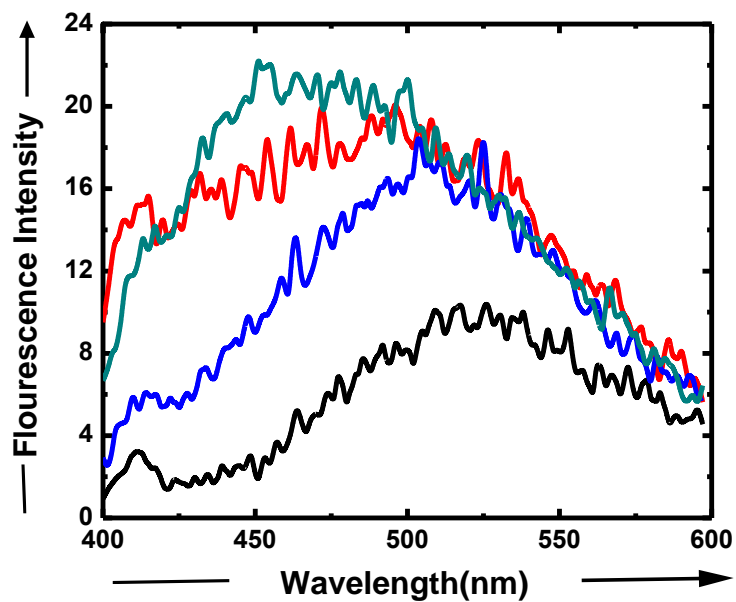

**Figure S3:** The fluorescence spectra of ANS in (a) water (black) (b) 0.5 M TMAO (red) (c) 0.5 M betaine (blue) and (d) 0.5 M sarcosine (dark cyan).
